# Supplementary material
Source: HighWire-hosted journal article supplement (https://www.cmaj.ca/highwire/filestream/59654/field_highwire_adjunct_files/2/151003-res-3-at.pdf)
Supplement: 151003-res-3-at.pdf [file 151003-res-3-at.pdf]

**Appendix 3 (as supplied by the authors): Cumulative distribution functions for primary and secondary outcomes**

**Figure 1. Cumulative distributions of changes in BCTQ SSS from baseline to week 17 <sup>^</sup>.**

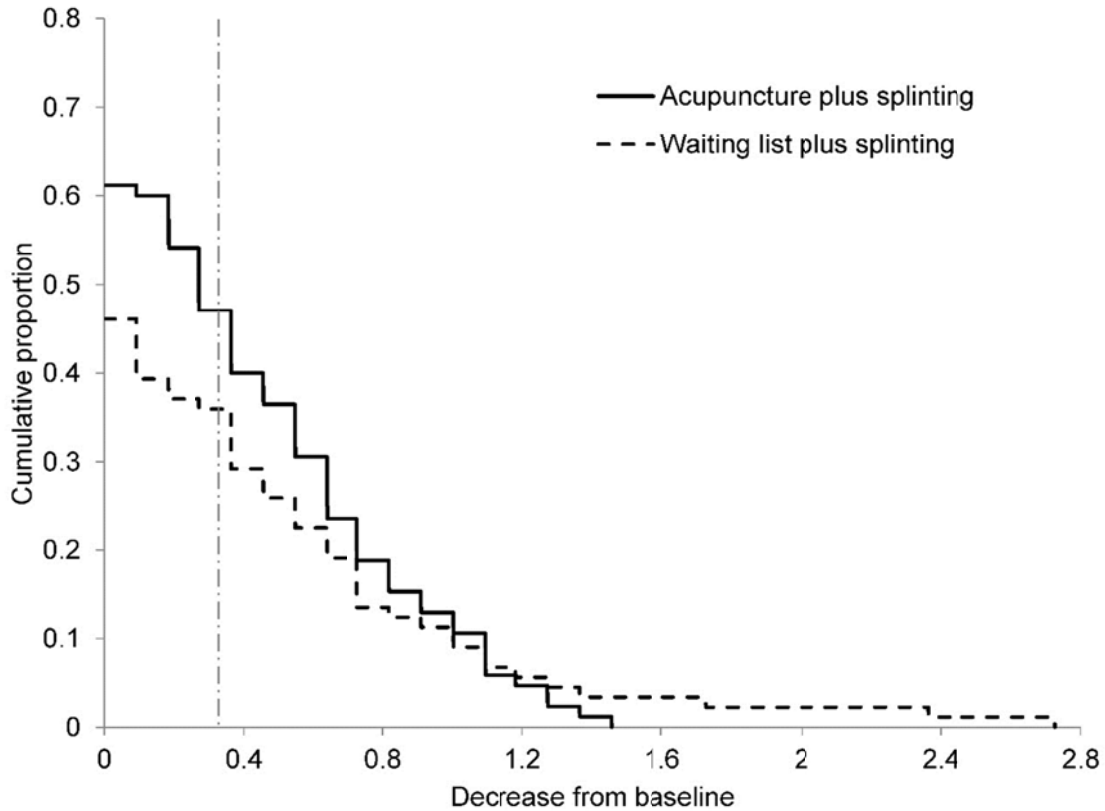

<sup>^</sup>Threshold for a clinically important change is defined as a half of the baseline SD for BCTQ SSS (0.33, shown in vertical dot dash line).

**Appendix Figure 2. Cumulative distributions of changes in DASH from baseline to week 17 <sup>^</sup>.**

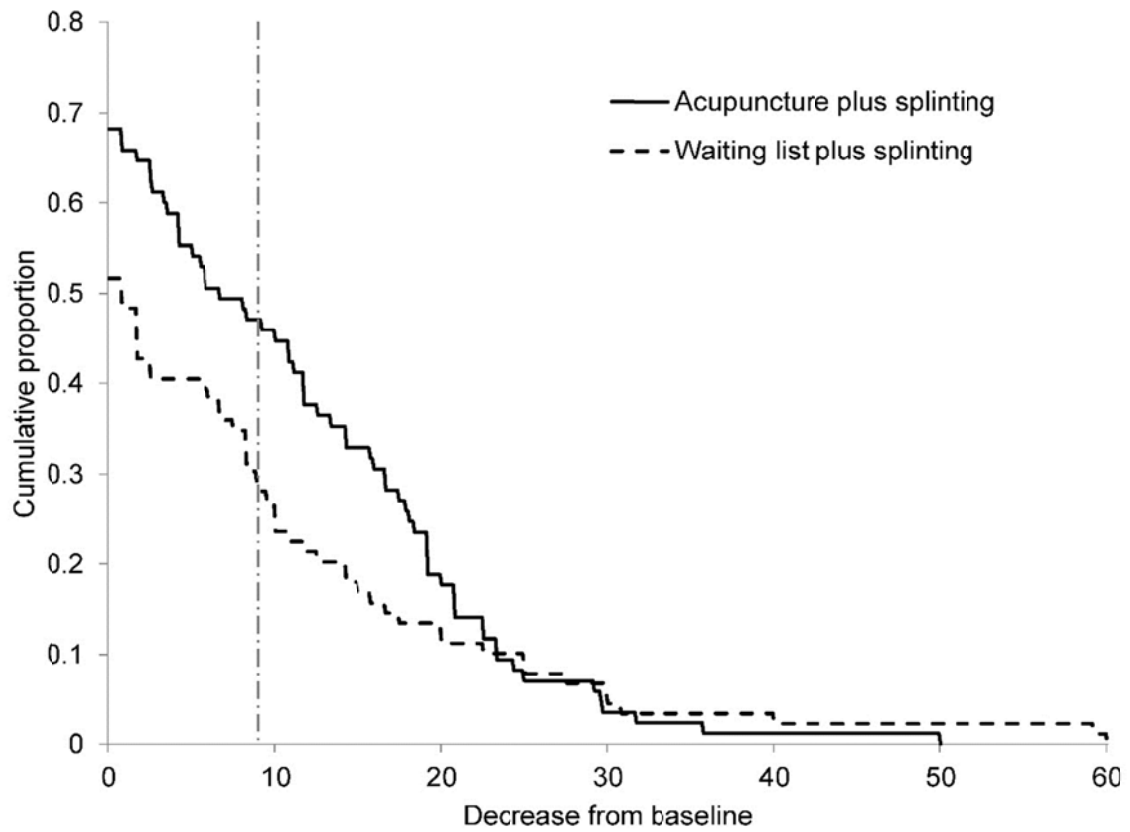

<sup>^</sup> Threshold for a clinically important change is defined as a half of the baseline SD for DASH (8.94, shown in vertical dot dash line)

**Appendix Figure 3. Cumulative distributions of changes in BCTQ FSS from baseline to week 17 <sup>^</sup>.**

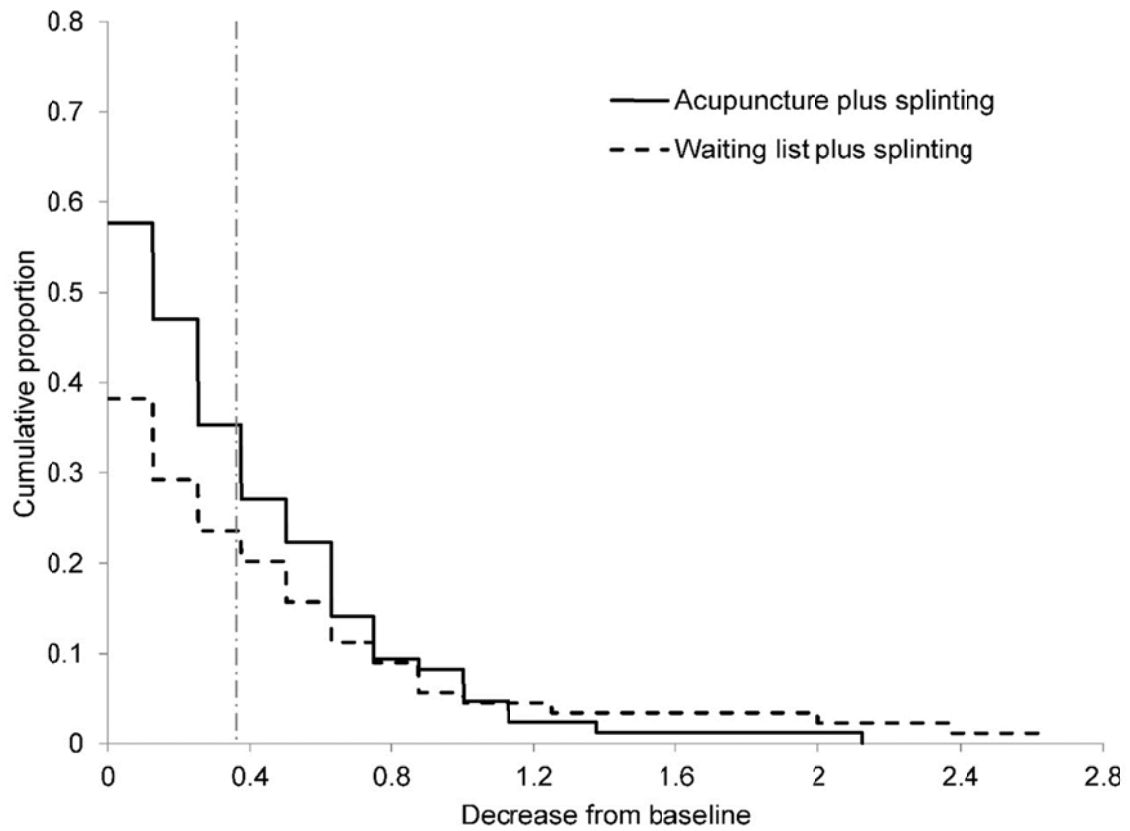

<sup>^</sup> Threshold for a clinically important change is defined as a half of the baseline SD for BCTQ FSS (0.36, shown in vertical dot dash line)

**Appendix Figure 4. Cumulative distributions of changes on pain intensity from baseline to week 17 <sup>^</sup>.**

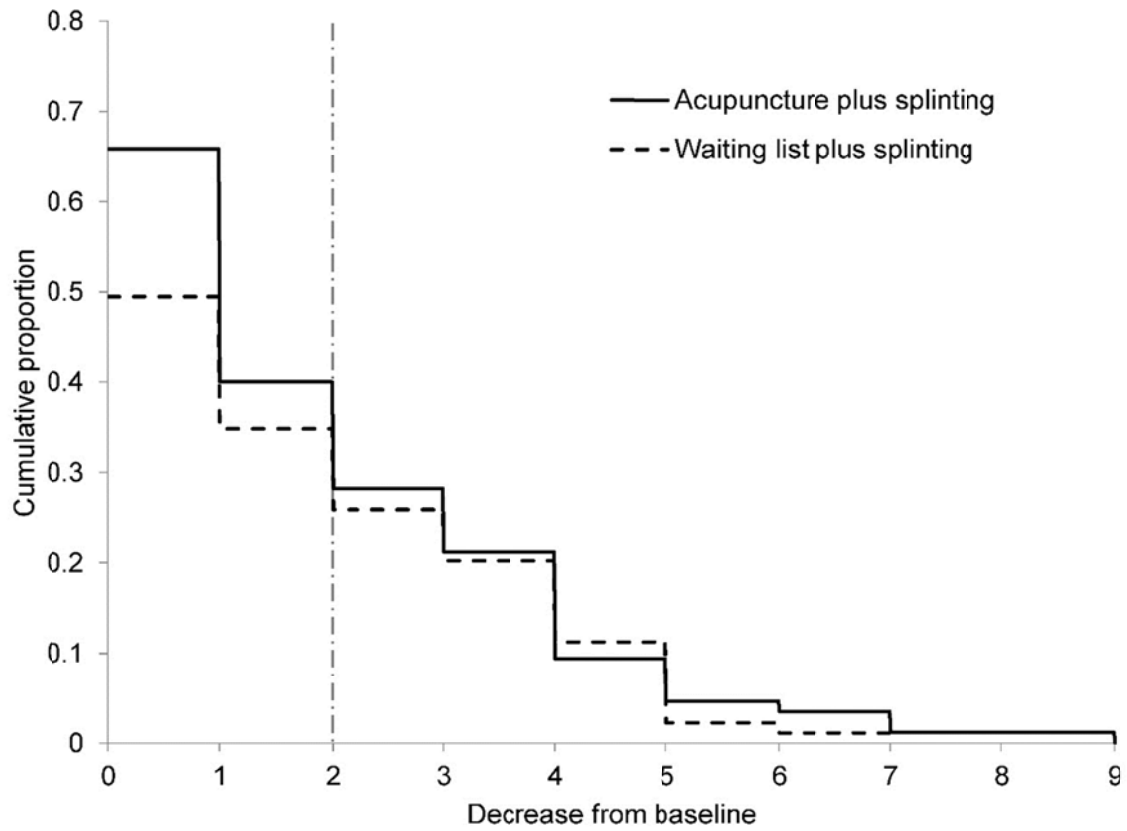

<sup>^</sup> Threshold for a clinically important change is defined as a 2 point reduction on the numeric rating scale (shown in vertical dot dash line).

**Appendix Figure 5. Cumulative distributions of changes in blinded DMMPUT completion time from baseline to week 17 <sup>^</sup>.**

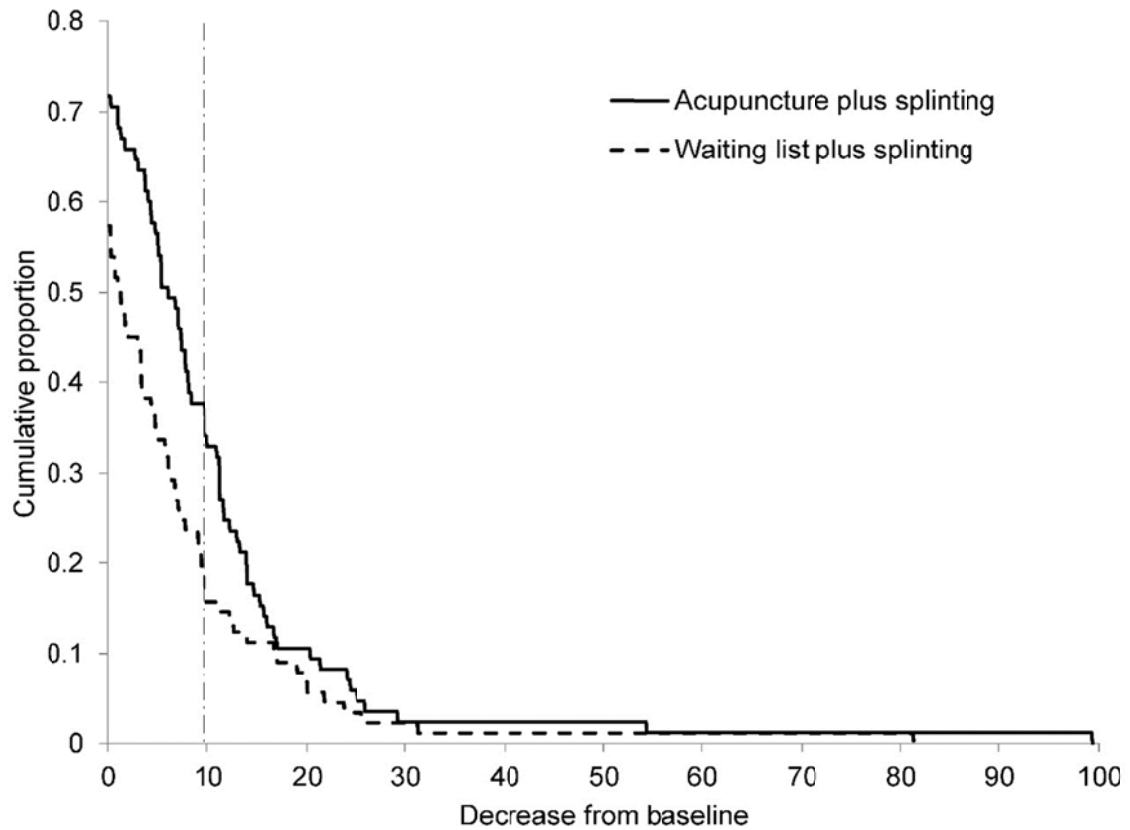

<sup>^</sup> Threshold for a clinically important change is defined as a half of the baseline SD for blinded DMMPUT completion time in seconds (9.6, shown in vertical dot dash line).

**Appendix Figure 6. Cumulative distributions of changes in maximal tip pinch strength from baseline to week 17 <sup>^</sup>.**

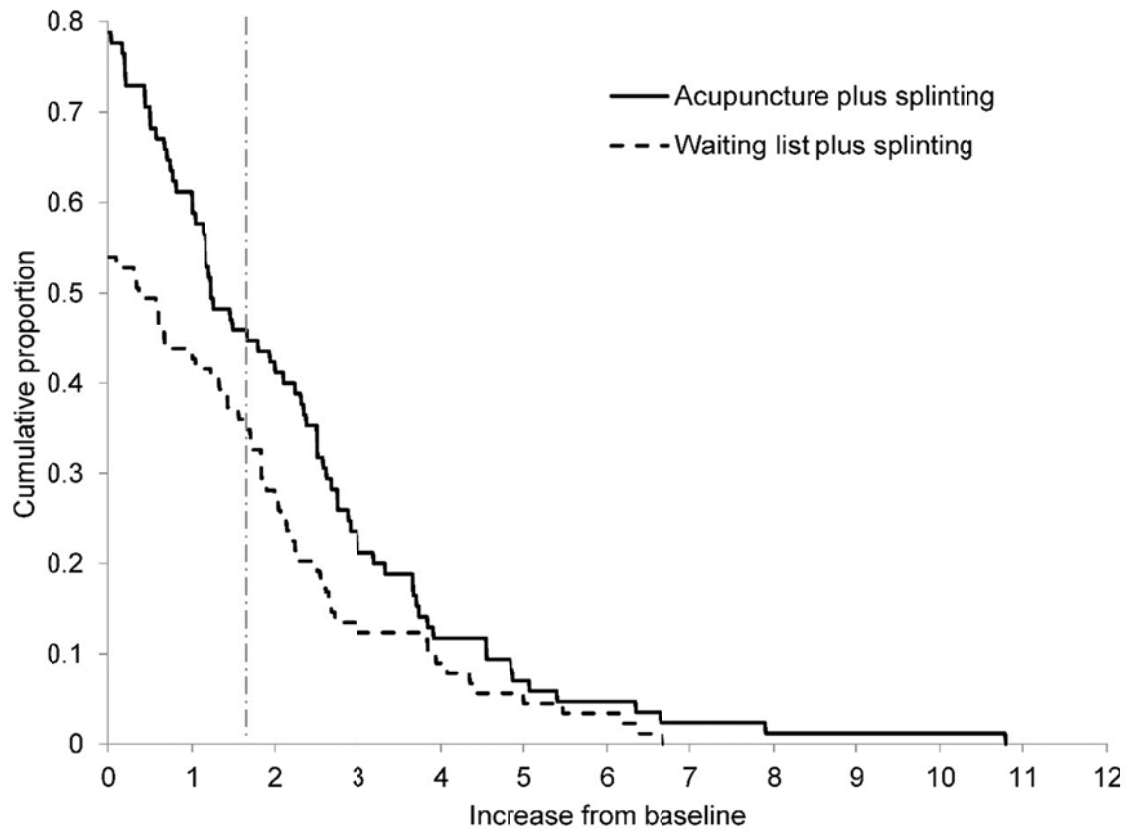

<sup>^</sup> Threshold for a clinically important change is defined as 1.66 lbs, as shown at the vertical dot dash line.
